# Supplementary material for: Gut microbial structural variation associates with immune checkpoint inhibitor response
Source: PubMed Central journal article supplement (PMC10654443; doi:10.1038/s41467-023-42997-7), 2023-11-16
Supplement: 41467_2023_42997_MOESM1_ESM.pdf [file 41467_2023_42997_MOESM1_ESM.pdf]

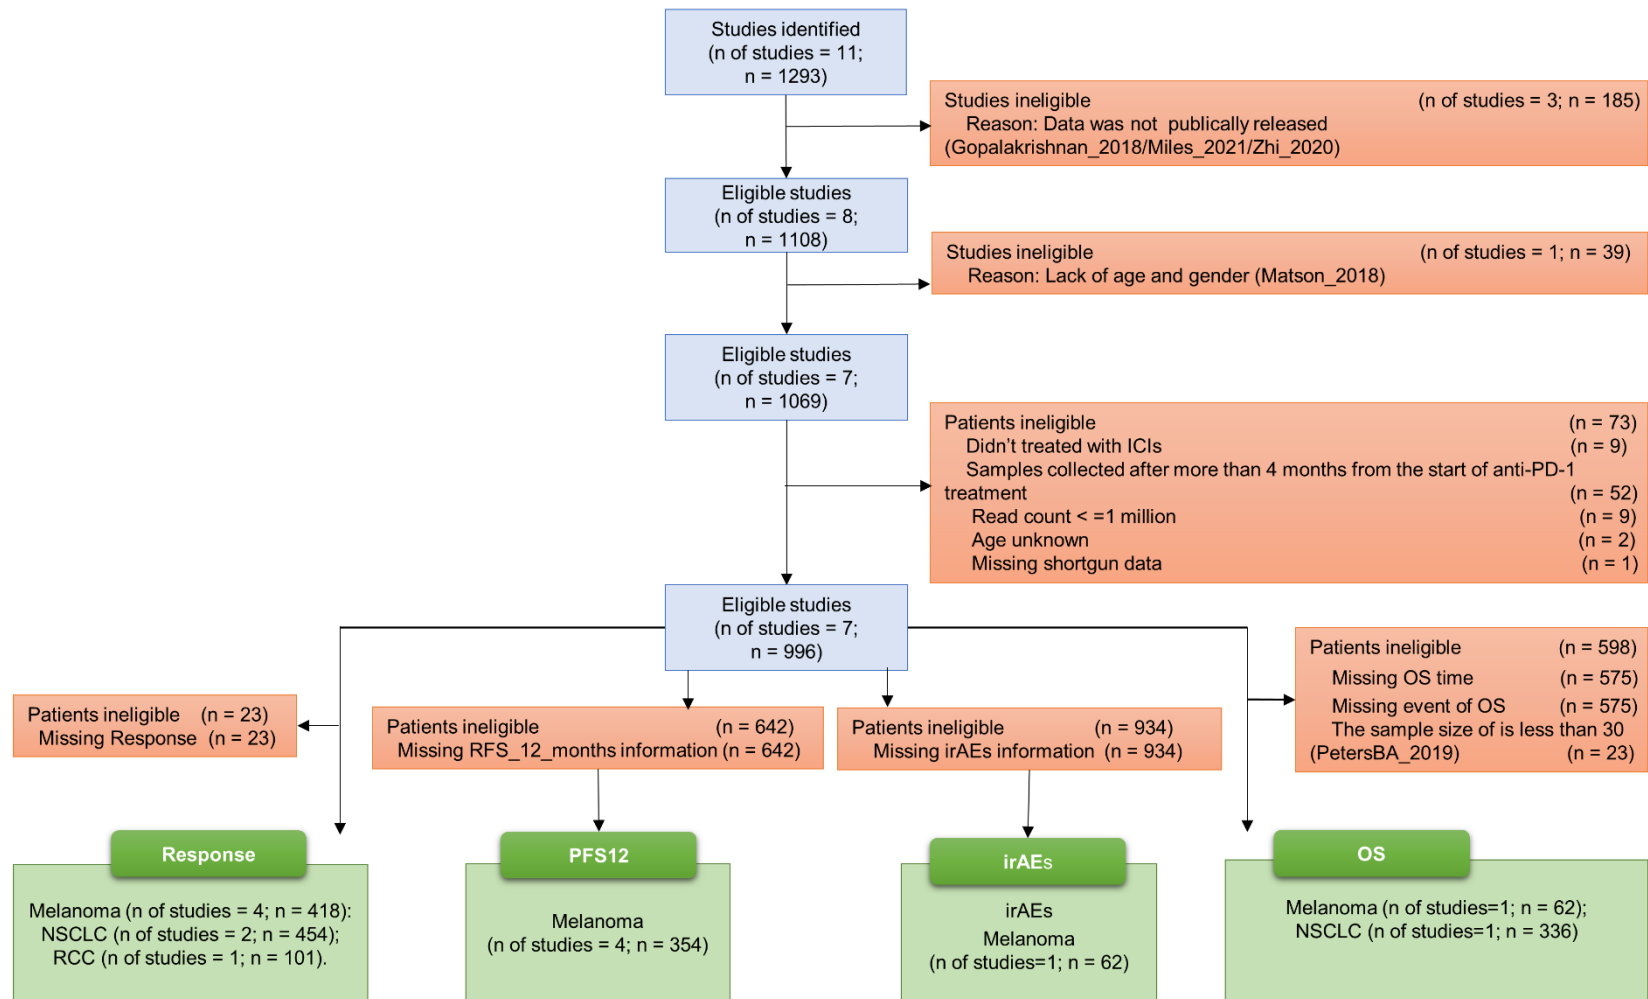

**Fig. S1. A flowchart of the study that details the samples utilized at each stage of statistical analysis.** OS: Overall survival. irAEs: immune-related adverse events. NSCLC: Non-small-cell lung cancer; RCC: Renal cell carcinoma. PFS12: progression-free survival at 12 months.

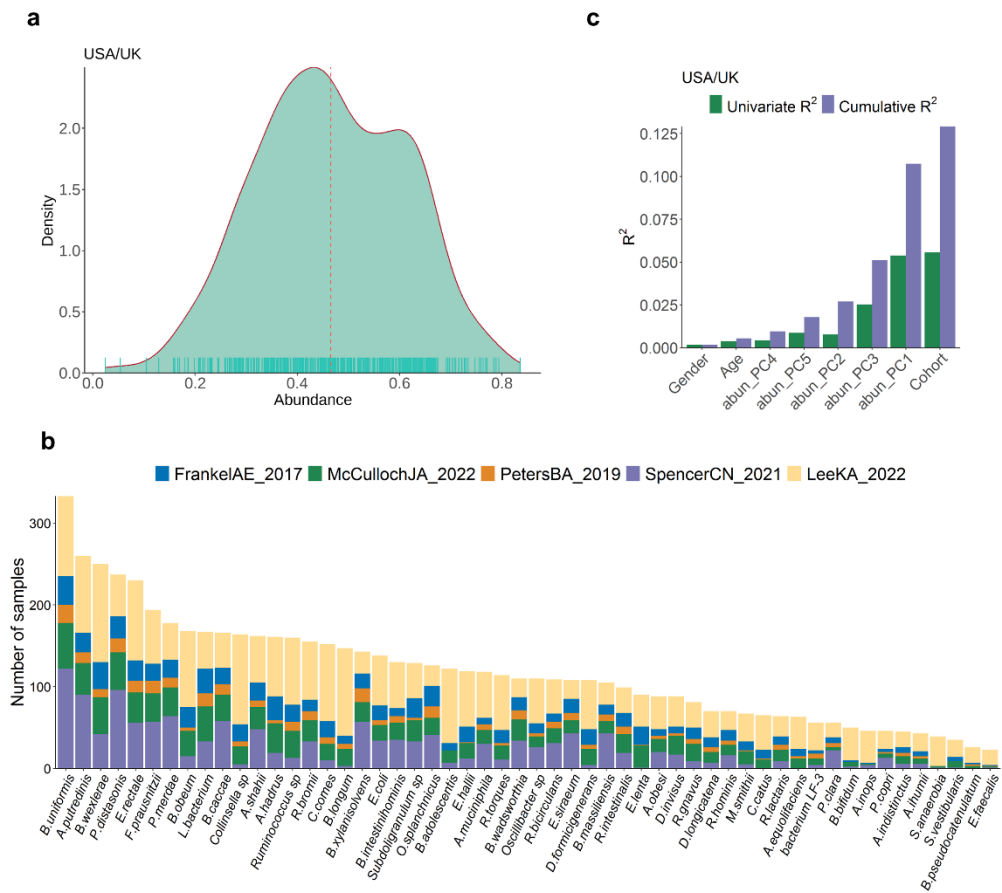

**Fig. S2. Characterization of microbial SV profile in cohort from USA or UK.** a) Distribution of the relative abundance of species detected with SVs. b) Numbers of samples with sufficient coverage across the reference genomes of each species. c) The proportion of SV-based genetic variance that is explained by basic phenotypic factors and microbial compositional factors.

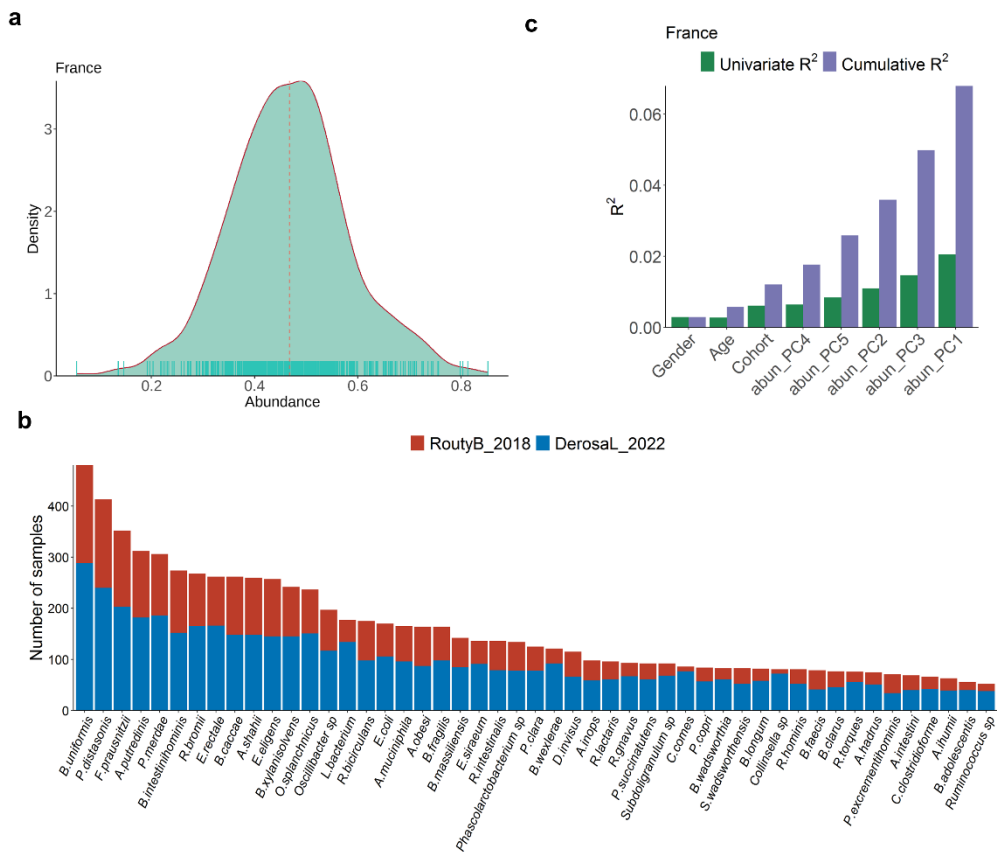

**Fig. S3. Characterization of microbial SV profile in cohort from France.** a) Distribution of the relative abundance of species detected with SVs. b) Numbers of samples with sufficient coverage across the reference genomes of each species. c) The proportion of SV-based genetic variance that is explained by basic phenotypic factors and microbial compositional factors.

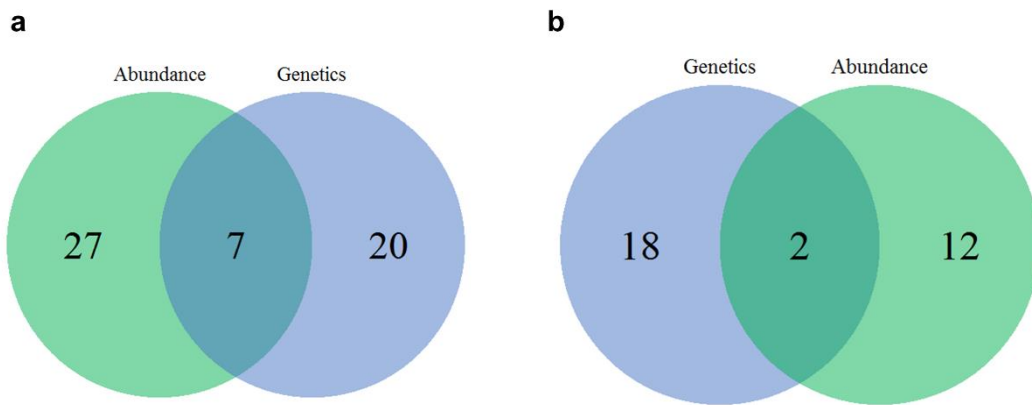

**Figure S4.** Number of significant associations with prognosis after ICI treatment for genetics and abundance in USA/UK cohorts (a) and France (b) cohort.

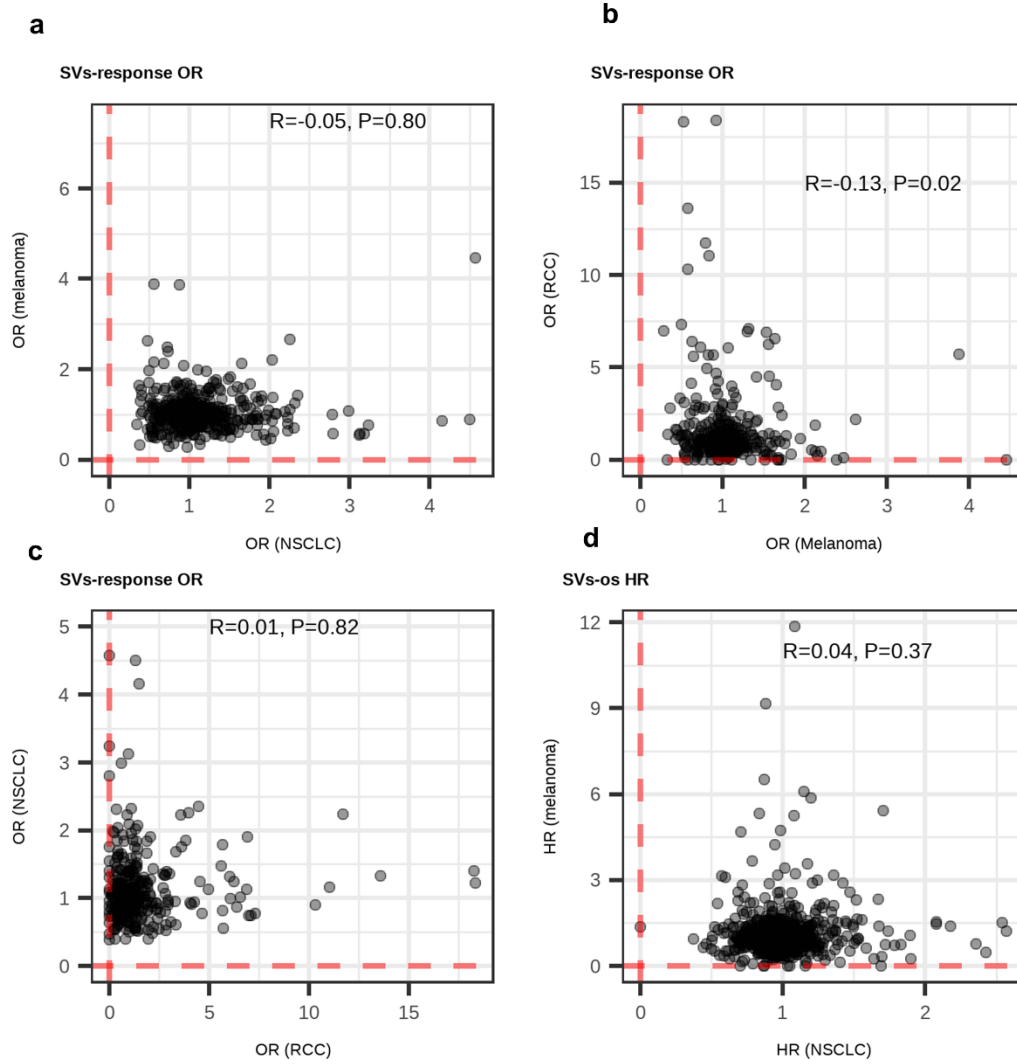

**Fig. S5.** The between-cancer type correlation of effect-sizes for associations with SVs (Spearman correlation).
